# Supplementary material
Source: PubMed Central journal article supplement (PMC3554128)

## Supporting Information

### **Genomic and proteomic profiling reveals reduced mitochondrial function and disruption of the neuromuscular junction driving rat sarcopenia**

Chikwendu Ibebunjo<sup>1</sup>, Joel M. Chick<sup>5</sup>, Tracee Kendall<sup>1</sup>, John K. Eash<sup>1</sup>, Christine Li<sup>1</sup>, Yunyu Zhang<sup>3</sup>, Chad Vickers<sup>1</sup>, Zhidan Wu<sup>1</sup>, Brian A. Clarke<sup>1</sup>, Jun Shi<sup>1</sup>, Joseph Cruz<sup>1</sup>, Brigitte Fournier<sup>1</sup>, Sophie Brachat<sup>1</sup>, Sabine Gutzwiller, QiCheng Ma<sup>2</sup>, Judit Markovits<sup>4</sup>, Michelle Broome<sup>4</sup>, Michelle Steinkrauss<sup>4</sup>, Elizabeth Skuba<sup>4</sup>, Jean-Rene Galarneau<sup>4</sup>, Steven P. Gygi<sup>5</sup>, David J. Glass<sup>1#</sup>

Additional supporting information may be found in the online version of this article:

## **Supplemental Methods:**

Details of proteomics analysis methods

## **Supplemental Tables.**

**Table S1:** Probes used for real-time PCR quantification of target and house-keeping genes

**Table S2:** Peptide score from proteomics analysis

**Table S3:** Clinical chemistry of rats aged 6-27 months

**Table S4:** Hematology of rats aged 6-27 months

**Table S5:** Expression of genes associated with the neuromuscular junction.

## **Supplemental Figures.**

**Figure S1:** Weights of the triceps brachii (A) and bulbocavernosus levator anii muscles (B), and hydroxyproline content of gastrocnemius muscles of 6-, 12-, 18-, 21-, 24- and 27-month old rats.

**Figure S2:** Most of the genes in the 5 complexes of the OXPHOS pathway were depressed in sarcopenia. The numbers to the right of the gene symbols are AUC over the time course.

**Figure S3:** Functional annotation analysis of the genes in cluster #4 (A) and cluster #5 (B) and the overlap between genes in clusters #3, #4 and #5 (C). Quantitative PCR verification of changes in expression of some genes in cluster #5 (D).

**Figure S4:** Quantitative PCR verification of the changes in expression of transcripts for myosin heavy chain (MyHC) isoforms (A), and Ctgf and MuRF1 in sarcopenia.

## **Supplementary Methods:**

### **Proteomics Analyses:**

*Tissue lysis and sample digestion:* The gastrocnemius muscle of rats in each of the 6-, 18- or 27-month old groups were pooled proportional to muscle weight. The pooled 6-, 18- and 27-month samples were each homogenized in 8 M urea and 50 mM Tris-HCl (pH 8) using an Omni TH homogeniser. Lysates were reduced with 5 mM dithiothreitol for 30 mins at 56°C and alkylated with 14 mM iodoacetamide at room temperature for 15 mins. Lysates were then acetone precipitated for 4 hours at 4°C with the addition of 0.5% deoxycholate. Samples were centrifuged at 2000 rpm and subsequently washed with ice cold acetone. Protein from each sample was re-suspended in 8 M urea and 50 mM Tris-HCl, and quantified using a BCA assay. Approximately, 500 µg of protein from each sample was diluted 4-fold with 50 mM Tris-HCl (pH 8) and digested using 4 mg of Lys-C at 37°C overnight.

*On-column desalting and dimethylation labeling:* Digested samples were acidified using formic acid. A 100 mg column was activated and equilibrated using a column volume of the following; 1) 100% methanol, 2) 80% ACN and 0.5% acetic acid, 3) 0.1% formic acid. Sample was then loaded onto the column and subsequently washed with a column volume of 0.1% formic acid. A 0.2 M citrate/ 0.4 M phosphate buffer was passed through the column to prepare it for dimethylation labeling. Peptides were then labeled on-column to produce three labels: 1) Light ( $\text{CH}_2\text{O}/\text{NaBH}_3\text{CN}$ ), 2) Medium ( $\text{CD}_2\text{O}/\text{NaBH}_3\text{CN}$ ), 3) heavy ( $\text{CD}_2\text{O}/\text{NaBD}_3\text{CN}$ ). Rat muscle sample corresponding to the 6 month old rat was labeled with light reagents, 18 month old sample with medium reagents and 27 month old sample was labeled with heavy reagents.

Samples were then washed with 0.1% formic acid and eluted from the column using 80% ACN and 0.5% acetic acid. Samples were then dried down using a vacuum centrifuge.

*Strong cation exchange chromatography:* Strong cation exchange (SCX) chromatography was performed as described previously with minor changes (5). Briefly, 0.75 mg of peptide from light/medium/heavy rat muscle samples was re-suspended in 500  $\mu$ l of SCX buffer A (7 mM KH<sub>2</sub>PO<sub>4</sub>, pH 2.65, 30% ACN) and separated on a 4.6 mm x 200 mm polysulfethyl aspartamide column (5  $\mu$ m particles; 200 Å pores; PolyLC), using a 36 min gradient from 0% to 50% buffer B (7 mM KH<sub>2</sub>PO<sub>4</sub>, pH 2.65, 30% ACN, 350 mM KCl) at a flow rate of 1 ml/min. Fractions were collected every 1.5 min, dried in a speed-vac evaporator (ThermoFisher), re-suspended in 1% FA, and desalted using self-packed C18 STAGE-tips (4). Peptides were eluted into glass inserts and re-suspended in 100  $\mu$ l of 5% ACN and 4% FA.

*LC-MS/MS Analysis:* All LC-MS/MS data were obtained using an LTQ-Orbitrap Discovery hybrid mass spectrometer (Thermo Fisher, San Jose, CA). 2  $\mu$ L of each SCX fraction was loaded onto a pulled fused silica microcapillary column (125  $\mu$ m, 18 cm bed volume) packed with C<sub>18</sub> reverse-phase resin (Magic C18AQ; 5- $\mu$ m particles; 200-Å pore size; Michrom Bioresources, Auburn, CA) using a Famos autosampler (LC Packings, San Francisco, CA). Once loaded, the peptides were separated using an Agilent 1200 series binary pump across a 95 min linear gradient of 5–27% buffer B (97% ACN, 0.125% FA) with an in-column flow rate of 0.5-1  $\mu$ L/minute. In each data collection cycle, one full MS scan (375–1800  $m/z$ ) was acquired in the Orbitrap [ $6 \times 10^4$  resolution setting, automatic gain control (AGC) target of  $10^6$ ], followed by 10 data-dependent MS/MS scans in the LTQ using the 10 most abundant ions and collision-

induced dissociation (CID) for fragmentation. The method dynamically excluded previously selected ions for 60 s, as well as rejected singly charged ions and unassigned charge states.

*Database Searching:* An in-house suite of software tools was used to convert mass spectrometric data from raw file to mzml format. Erroneous protein ion charge state and monoisotopic m/z were corrected as per previous publication (3). MS/MS spectra assignments were made with the Sequest algorithm (2) using the entire rat IPI database (version 3.6). Sequest searches were performed using a target-decoy strategy (1) with the rat IPI database in correct orientation (forward database) and the same database but with all sequences in reverse orientation (reverse database). The rat IPI database contained 113,477 entries. The data was searched using a precursor ion tolerance of 50 ppm, considering LysC specificity and allowing two missed cleavages. For dimethyl labels, a static modification of 28.0313 Da was used on the n-terminus and lysine residues. In addition, differential modifications of 4.02310 Da and 8.044336 Da were used for medium and heavy proteins, respectively, on the N-terminus and lysine residues. A protein level false discovery (FDR) rate of less than 1% was used as a threshold for protein identifications using the target decoy strategy. Additional filtering was achieved using a linear discriminant analysis, which combined several parameters into a single probability for each protein and these probabilities were used to achieve a less than 1% FDR. The parameters used for linear discriminant analysis were Xcorr, DCn, protein mass accuracy and charge state, and protein length. After protein level filtering, a 1% protein level false discovery rate was used.

*Protein Quantification:* Quantification of each protein was determined using the peak heights for light, median and heavy forms for that protein. The criterion for protein quantification was a signal-to-noise ratio of >5 for at least one of the protein species (light, medium, heavy). At the protein level, quantification was determined by calculating the median value of the ratios of light:medium and light:heavy.

*References:*

1. Elias, J. E., and S. P. Gygi. 2007. Target-decoy search strategy for increased confidence in large-scale protein identifications by mass spectrometry. *Nat Methods* 4:207-214.
2. Eng, J. K., A. L. McCormack, and J. R. Yates III. 1994. An approach to correlate tandem mass spectral data of peptides with amino acid sequences in a protein database. *Journal of the American Society for Mass Spectrometry* 5:976-989.
3. Huttlin, E. L., M. P. Jedrychowski, J. E. Elias, T. Goswami, R. Rad, S. A. Beausoleil, J. Villen, W. Haas, M. E. Sowa, and S. P. Gygi. 2010. A tissue-specific atlas of mouse protein phosphorylation and expression. *Cell* 143:1174-1189.
4. Rappsilber, J., Y. Ishihama, and M. Mann. 2003. Stop and go extraction tips for matrix-assisted laser desorption/ionization, nanoelectrospray, and LC/MS sample pretreatment in proteomics. *Anal Chem* 75:663-670.
5. Villen, J., S. A. Beausoleil, S. A. Gerber, and S. P. Gygi. 2007. Large-scale phosphorylation analysis of mouse liver. *Proc Natl Acad Sci U S A* 104:1488-1493.

**Table S1:** Probes used for real-time PCR quantification of target and house-keeping genes

| Gene Symbol | Gene Name                                                               | ABI Probe ID  |
|-------------|-------------------------------------------------------------------------|---------------|
| Bad         | Bcl2-antagonist of cell death                                           | Rn00575519_m1 |
| Casp3       | caspase 3, apoptosis related cysteine protease                          | Rn00563902_m1 |
| Chrna1      | cholinergic receptor, nicotinic, alpha 1 (muscle)                       | Rn00577938_m1 |
| Chrnd       | cholinergic receptor, nicotinic, delta                                  | Rn01401089_m1 |
| Chrne       | cholinergic receptor, nicotinic, epsilon                                | Rn00567899_m1 |
| Chrng       | cholinergic receptor, nicotinic, gamma                                  | Rn00569614_m1 |
| Cpt1b       | Carnitine palmitoyltransferase 1b                                       | Rn00566242_m1 |
| Ctgf        | connective tissue growth factor                                         | Rn00573960_g1 |
| Drp1        | dynamamin 1-like                                                        | Rn00586466_m1 |
| ERRα        | Estrogen related receptor, alpha                                        | Rn00433142_m1 |
| Fabp3       | Fatty acid binding protein 3                                            | Rn00577366_m1 |
| Fbxo30      | F-box only protein 30                                                   | Rn01440751_m1 |
| Fis1        | Ttc11,fission 1 (mitochondrial outer membrane) homolog (S. cerevisiae)  | Rn01480911_m1 |
| Fst         | Follistatin                                                             | Rn00561225_m1 |
| Hdac4       | Histone deacetylase 4                                                   | Rn01427053_m1 |
| Idh3a       | Isocitrate dehydrogenase 3 (NAD+) alpha                                 | Rn00586270_m1 |
| IGF2        | insulin-like growth factor 2                                            | Rn01454518_m1 |
| Mfn1        | mitofusin 1                                                             | Rn00594496_m1 |
| Mfn2        | mitofusin 2                                                             | Rn00500120_m1 |
| Mstn        | Myostatin                                                               | Rn00569683_m1 |
| Musk        | muscle, skeletal, receptor tyrosine kinase                              | Rn01422881_m1 |
| Myh1        | myosin, heavy polypeptide 1, skeletal muscle, adult; MyHC-2X/D          | Rn01751056_m1 |
| Myh2        | myosin, heavy polypeptide 2, skeletal muscle, adult; MyHC-2A            | Rn01470669_m1 |
| Myh3        | myosin, heavy chain 3, skeletal muscle, embryonic                       | Rn00561539_m1 |
| Myh4        | myosin, heavy chain 4, skeletal muscle; MyHC-2B                         | Rn01496087_g1 |
| Myh7        | myosin, heavy chain 7, cardiac muscle, beta; MyHC-slow, MyHC-1,         | Rn00691731_m1 |
| Myh8        | myosin, heavy chain 8, skeletal muscle, perinatal                       | Rn01751714_g1 |
| Myog        | myogenin                                                                | Rn00567418_m1 |
| Opa1        | optic atrophy 1 homolog                                                 | Rn00592200_m1 |
| Ppargc1a    | peroxisome proliferative activated receptor, gamma, coactivator 1 alpha | Rn01453110_m1 |
| Tbp         | TATA box binding protein                                                | Rn01455646_m1 |
| Tmem1       | transmembrane protein 1                                                 | Rn01427961_m1 |
| TRIM63      | tripartite motif-containing 63; MuRF1                                   | Rn00590197_M1 |
| Uqcrc1      | Ubiquinol-cytochrome c reductase core protein 1                         | Rn01521194_m1 |
| Utrn        | Utrophin                                                                | Rn00565137_m1 |
| Vegfa       | vascular endothelial growth factor A                                    | Rn01511605_m1 |
| Vps26a      | vacuolar protein sorting 26 homolog A                                   | Rn01433543_m1 |
| Znf830      | zinc finger protein 830                                                 | Rn02748665_s1 |

**Table S2.** Peptide score from proteomics analysis. The contribution of single peptide protein species in the dataset was low (<5%) presumably reflecting the high accuracy and sensitivity of the MS methods, the high signal-to-noise cut off used.

| No. peptide species | # Genes | % of total peptides | Gene symbols                                                                                                                                                                                                                                                                                                                                                                                                                                                                                                                                                                                                                                                                                                                                                                                                                                                                                                                                                                                                                                                                                                                                                                                                                                                                                                                                                                                                                                                                                                                                                                                                                                                                                                   |
|---------------------|---------|---------------------|----------------------------------------------------------------------------------------------------------------------------------------------------------------------------------------------------------------------------------------------------------------------------------------------------------------------------------------------------------------------------------------------------------------------------------------------------------------------------------------------------------------------------------------------------------------------------------------------------------------------------------------------------------------------------------------------------------------------------------------------------------------------------------------------------------------------------------------------------------------------------------------------------------------------------------------------------------------------------------------------------------------------------------------------------------------------------------------------------------------------------------------------------------------------------------------------------------------------------------------------------------------------------------------------------------------------------------------------------------------------------------------------------------------------------------------------------------------------------------------------------------------------------------------------------------------------------------------------------------------------------------------------------------------------------------------------------------------|
| >2000               | 1       | 0.08                | Ckm                                                                                                                                                                                                                                                                                                                                                                                                                                                                                                                                                                                                                                                                                                                                                                                                                                                                                                                                                                                                                                                                                                                                                                                                                                                                                                                                                                                                                                                                                                                                                                                                                                                                                                            |
| 1000-1999           | 1       | 0.08                | Mb                                                                                                                                                                                                                                                                                                                                                                                                                                                                                                                                                                                                                                                                                                                                                                                                                                                                                                                                                                                                                                                                                                                                                                                                                                                                                                                                                                                                                                                                                                                                                                                                                                                                                                             |
| 500-999             | 7       | 0.55                | Atp2a2, Atp2a1, Car3, Pgm1, Pkm2, Alb, Ldha                                                                                                                                                                                                                                                                                                                                                                                                                                                                                                                                                                                                                                                                                                                                                                                                                                                                                                                                                                                                                                                                                                                                                                                                                                                                                                                                                                                                                                                                                                                                                                                                                                                                    |
| 400-499             | 4       | 0.32                | Acta1, Pgm1, Aldoal1, Aldoa                                                                                                                                                                                                                                                                                                                                                                                                                                                                                                                                                                                                                                                                                                                                                                                                                                                                                                                                                                                                                                                                                                                                                                                                                                                                                                                                                                                                                                                                                                                                                                                                                                                                                    |
| 300-399             | 7       | 0.55                | Gpi, Pygm, Atp5b, LOC360504, Pvalb, Myl1, Atp5a1                                                                                                                                                                                                                                                                                                                                                                                                                                                                                                                                                                                                                                                                                                                                                                                                                                                                                                                                                                                                                                                                                                                                                                                                                                                                                                                                                                                                                                                                                                                                                                                                                                                               |
| 200-299             | 12      | 0.95                | Gapdh, Hspa8, Aco2, Mdh1, Eno3, Ahnak, Mdh2, Ak1, Park7, Myh2, Tpm1, Tpi1                                                                                                                                                                                                                                                                                                                                                                                                                                                                                                                                                                                                                                                                                                                                                                                                                                                                                                                                                                                                                                                                                                                                                                                                                                                                                                                                                                                                                                                                                                                                                                                                                                      |
| 100-199             | 40      | 3.17                | Idh2, Hspd1, Mylpf, Srprb, Gpd1, Casq1, Neb, Sucla2, Nnt, Pgam2, Vdac1, MGC72973, Cps1, Anxa6, Cryab, Hspb1, Eef1a2, Acadl, Ldb3, Eef1a1, Myh8, Hadha, Ugp2, Bin1, Tnni2, Myom2, RGD1564958, Etf, Uqcr2, Myh6, RGD1565338, RGD1561178, Pygm, Ndufs1, Pfk, Acadvl                                                                                                                                                                                                                                                                                                                                                                                                                                                                                                                                                                                                                                                                                                                                                                                                                                                                                                                                                                                                                                                                                                                                                                                                                                                                                                                                                                                                                                               |
| 20-100              | 236     | 18.69               | Pebp1, Got1, Atp5c1, RGD1303003, Got2, Flnc, Ckmt2, Pdhb, Hsp90aa1, LOC297568; Mug1, Hspa9, Pdia3, Hbb, Slc25a4, Map4, Atp5o, Tpm2, Lum, Fhl1, Tnnt3, Dcn, Mybpc1, Immt, Slc25a5, Hspa5, Fhl1, Aldh2, Vdac2, Lgals1, Hsp90ab1, Ldhh, Agl, P4hb, Acaa2, Myh3, Akr1b1-s2, Prdx5, Atp2a3, Acat1, Myh1; Myh2, IgG-2a, Sdha, Etfb, Ptrf, Cyca, Ldb3, Apo4, Trim72, Sdhb, Cisd1, Aldh6a1, LOC299282, Hspe1, Cs, Wdr1, Psmc3, Pdlim3, Fabp4, Pzp, Hibadh, Atp5f1, Acadm, Vapa, Tufm, Tra1, Tpm3, RGD1565368, Echs1, Caena2d1, Uqcr1, Tubb6, Ivd, Tuba1a, Prdx1, Myom1, Plec1, Dlat, Vcp, Hspa1b; Hspa1a, Etfhd, Cp, Myl3, Hadh, Stip1, Oxct1, Nme2, Dmd, Ampd1, Myh2, Calr, Serpina3n, Pfn1, Nnt, Mybpc2, Mpz, Hpx, Vdac3, Tln1, Suclg1, Ppp2r1a, Cct8, Uqcrb-ps1; Uqcrb, Tubb5, Col6a3, Anxa2, Actb, Serpina1, Ndufa4, Ndufa1011, Myh7, Idh3a, Cox5a, Clip1, Atic, Myh2, Dld, Apo4, Ppp1r3a, Pgm1, Nme2-ps1, Hint11; Hint1, Gdi2, Asp, Ywhae, Uba1, Ndufa7, Letm1, Fkbp3, Fga, Eprs, Atp5h, Myh11, Hspa4, Eef2, Cat, Aldh9a1, Ywhag, Ndufa2, Dysf, Cox5b, Cndp2, Sod2, Serpina3k, Eif5a, Cfl1, Cacnb1, Rtn4, Prdx6, Ndubf9, Kif5b, Aldh11, Ahnak, Acs1, Strap, RGD1566161, Mt-atp8, LOC684425, Hspa2, Ckmt2, Ahnak, Tpm2, Stac3, Phkb, Ola1, Nampt, Myh9, Kbtbd10, Hadhb, Gyg1, Gpd11, Casq2, Postn, Gpt, Glud1, Flna, Dci, Bcap31, Atp5j, RGD1565238, Pdha1, Csda, Anxa1, Ywhab, Gbas, Ttn, Smpx, Gda, Eif3j, Cox4i1, Cct5, Cav1, Akr1b1, Adsl, Serbp1, Rtn2, Psm1, Prdx2, Phb2, Ogdh, Msn, LOC681252, Eef1g, C3, Sneg, Sdpr, RGD1561141, Qdpr, Ndufa9, Mapk12, Ehd1, Atp5l, Sh3bgr, Pdhx, Pdap1, Myoz1, Gys1, Fhl1, Dctn2, Cyc1, Cox6c, Clu, Aifm1, Vim, Prepl, Ndufs4, Ndufs2, Ndubf5, LOC686059, Esd, Dag1, Adss |
| 11-19               | 235     | 18.61               | Txn1, Slmap, Psm1, Ndufs3, Ndr2, Mylk2, Mvp, LOC679739; LOC692052, Kng1, Hsd12, Hsd17b10, Hp, Gart, Des, Cct2, Bag3, Ttn, Synpo2, Slc25a3, Skp1, Rplp2, Prdx3, Peci, Npepps, Nefl, Ndubf1, Hmgb1-ps3, Fbp2, Ehd2, Cdc42, Actn3, Txn11, Tpm4, Tnnc2, S100a13, RGD1559626, Rdx, Prx, Pgp, Pdlim5, Pdia4, Ogn, Nit2, Ndufa12, Mrps36, LOC678701, LOC497813; Rps7, Lmcd1, Idh3B, Idh1, Hist1h1d, Dlst, Cox7a2; LOC688386, Clic1, Cct7, Atp12a, Arhgdia, Actc1, Acads, Ywhaz, Stim1, Rps8, Rpl28, Reep5, Psm6, Ppp3ca, Nrap, Nefm, Ndufs8, Myl2, Mpi, Map1a, Lrpprc, LOC689064; LOC100134871; MGC72973; Hbb, Itih4, Flot2, Eno1, Ctsd, Csrp1, Crat, Chchd3, Ces3, Asph, Anxa6, Ankrd2, Acaa2, Tuba4a, Ttn,                                                                                                                                                                                                                                                                                                                                                                                                                                                                                                                                                                                                                                                                                                                                                                                                                                                                                                                                                                                                          |



|      |     |       |                                                                                                                                                                                                                                                                                                                                                                                                                                                                                                                                                                                                                                                                                                                                                                                                                                                                                                                                                                                                                                                                                                                                                                                                                                               |
|------|-----|-------|-----------------------------------------------------------------------------------------------------------------------------------------------------------------------------------------------------------------------------------------------------------------------------------------------------------------------------------------------------------------------------------------------------------------------------------------------------------------------------------------------------------------------------------------------------------------------------------------------------------------------------------------------------------------------------------------------------------------------------------------------------------------------------------------------------------------------------------------------------------------------------------------------------------------------------------------------------------------------------------------------------------------------------------------------------------------------------------------------------------------------------------------------------------------------------------------------------------------------------------------------|
|      |     |       | Snta1, Serpincl, Ppa1, Hprt1, Eef1b2l, Dnm1l, Ddx1, Cdh13, Cand2, C9, Atp1a2, Apoalbp, Tmsb4x, Selenbp1, RGD1565416, Ppia, Pm20d2, Pdlim5, Myh11, Murc, LOC500183, Hdgf, Gstp1, Cox6b1-ps1; Cox6b1, Cmpk1, Cct6a, Camk2b, C1qbp, Bsg, Basp1, Auh, Alpk3, Aco1, Tmem38a, Serpinf1, Rpl5, RGD1564688, Rcsd1, Rars, Pygl, Psma7, Psma3; Psma3l, Prkar2a, Pdpr, Obscn, Ndufc2, Ndufb11, Nap114, Mapt, Lta4h, Hspb6, Hnrnpu, Hmgn2, Hagh, Cnn1, Cfb, Camk2g, Bcat2, Atp5i, Anxa11, Aldh5a1, Ahcy, Vapb, Txlnb, Tpm1, Sgcd, Set, Rpl23, Rpl13, RGD1311863, Psma5, Ppa2, Pdia6, Nid1, Mt-co2, LOC680312, Kera, Itgb1, Homer1, Dync1h1, Dbi, Csrp3, Coq9, Col6a1, Car2, Baz1b, Arpc5l, Aldh7a1, Akap12, Aars, Ybx1, Wars, Visa, Vcl, Usp5, Ttr, Tppp3, Tceb2, Tagln2, Sncg, Rrbp1, Rpn1, RGD1561176, Rab2a, Rab1b-ps1; Rab1b, Psm2, Psma2, Ppp2r2a, Ppib, Plaa, Pdlim5, Pdc6dip, Pccb, Naca, Myh13, LOC680097; Hist1h4m; Hist1h4b; LOC679983; RGD1562378; LOC682518; Hist2h4; RGD1565073; LOC684621; LOC680430; LOC684887; LOC684745, Lama2, Idh3g, Gstm4, Gsta2; Gsta3; Gsta1, Gsn, Es1, Erlin2, Ehbp11l, Ctsb, Crip, Ckap4, Chmp4b; LOC679886, Cald1, Blvra, Atp1a1, Apoe, Actr1b, Acadvl                                                           |
| 9-10 | 68  | 5.38  | Them2, Tcp1, Scp2, Rps23, Rpl4, Rpl17, RGD1561839, Psmc4, Psmb3, Psma4, Prkab2, Otub1, Opa1, Ndufaf4, Ndufa6, Myot, Myl6l, Mbp, Map2k1, LOC297568; Mug1, Hnrnpk, Gsto1, Gstm2, Glod4, Gars, Cpt2, Cdnf, Cbs, Cap2, Atp6v1b2, Arbp, Akap14, Unc45b, Trdn, Tmed10, Tkt, Taldol, Synpo, Suclg2, Spag9, Serpinh1, Scpep1, Rtn4, RGD1305235, Rcn1, Pfdn5, Pdhx, Peyox1, Nuks1, Nmt1, Macrodl, Hnrpd1, Hmgn2, Gpx1, Fam114a2, Eea1, Cyb5r1, Cryz, Clpp, Car1, Bpgm, Bin1, Bckdha, Acsf2                                                                                                                                                                                                                                                                                                                                                                                                                                                                                                                                                                                                                                                                                                                                                             |
| 7-8  | 113 | 8.95  | Uso1, Tsc22d1, Tomm34, Tnnc1, Tfam, Tagln, Smtnl1, Rps25, Rpl36a-ps1; Rpl36al; Rpl36a; Rpl36a-ps2, Rad23b, Rab7a, Ptms, Psm2, Psmc5, Psmc1, Pemt1, Pc, Pak2, Nsf11c, Ndufb10, Napa, Mrpl12, Mapt, LOC684270, Kpna3, Kng11l, Klc1, Hmgb1, Gapdh; LOC685186; LOC682005, F2, Dpysl2, Ddb1, Dctn1, Dci, Cyb5a, Cops3, Clybl, Cct4, Cbr1, Cast, Capg, Canx, Camk2a, C4b, Atp1b1, Apool, Anxa4, 41, 163.00, 41, 154.00, Ywhaq, Ywhah, Yars, Tns1, Tceb1, Synm, Strn3, Spna2, Sod1, Rsu1, Rps3a, Rps11, Rplp1, Rpl3l, Rpl11, Rpl10a, RGD1564560, Rab1, Ptgr2, Psmc2, Plg, Pgd, Pfkfb1, Pdc5, Osbp, Nme1, Nln, Ncl, Mut, Metap2, Mccc2, Mccc1, Map1b, LOC691933, LOC690131; Hist2h2aa3; LOC682560, LOC686648; LOC680058, Ktn1, Kars, Hmgcl, Gapdhs, Fgb, Epb4.1l2, Eif4b, Dusp3, Dpysl3, Decr1, Cox7a2l, Cand1, Bgn, Bcl2l13, Ass1, Asrgl1, Arhgdib, Arg1, Apoc1, Anxa5, Anxa3, Anp32e, Ak3, Afg3l2, Adh4                                                                                                                                                                                                                                                                                                                                             |
| 5-6  | 164 | 12.98 | Ttn, Tst, Tpp2, Tpm3, Syap1, Stoml2, Slc16a1, Serpina4, S100a4, Rps6, Rpl23a, RGD1565438, RGD1561425, RGD1561137, RGD1309696, Rab10, Ptma, Psme2, Psm2, Psmb7, Psmb1, Prepl, Ppp1r2p9, Ppm2c, Pitrm1, Phkg1, Phb, Pdlim7, Pcyt2, Pabpc4, Pa2g4, Nucb1, Nt5c1a, Nploc4, Ndufa5, Myh11, Mthfd1, Me1, LOC680988, LOC362855, Ldb3, Kng1; Kng2, Kat3, Jph2, Itpa, Igh-6, Hmgcs2, Hcca2, Gspt1, Gpx6, Gpx4, Glo1, Fmod, Fech, Eif4g1, Eif3s9, Eif3h, Eif1b, Eef1b2, Dnaja2, Crkl, Cltb, Cdc37, Carkd, Capn2, Calu, Atp5d, Art3, Arpc1b, Arl6ip5, Arl6ip2, Aprt, Aldh3a2, Aldh1a1, Ahsg, Afm, Actr2, Abce1, Zyx, Xirp1, Vps4a, Uqcrfs1, Ubac1, Txndc12, Tubb2c, Tpd52l2, Tomm40, Tnnt1, Timm44, Timm10, Stbd1, Smtnl2, Scye1, Sccpdh, S100b, Rps14, Rpn2, Rpl35, Rpl24, Rnh1, RGD735140, RGD1565192, RGD1565010, RGD1564801, RGD1564318, RGD1309676, Rabggtb, Ptgr2, Psm2, Prpf19, Prkca, Ppp3cb, Pls3, Picalm, Pfdn1, Pbxip1, Pacsin2, Ociad1, Nqo2, Npepl1, Nap11l, Mtpn, Mrps35, Marcks1l, Mapre3, Lonp1, LOC287167, Lmnbl, Ipo7, Impdh2, Hspb8, Gsk3b, Gfer, Gc, Fahd2a, Ensa, Eif4a2, Dtna, Dnaja4, Diaph1, Ddx19a, Ddah1, Crip2, Coq3, Cops2, Colla1, Cnp, Cfi, Capn1, Calu, Atpif1, Arl3, Aldh1a7, Adk, Adh1, Acss2, Acs16, Acot9, Acad9, A2m |

|              |             |            |                                                                                                                                                                                                                                                                                                                                                                                                                                                                                                                                                                                                                                                                                                                                                                                                                                                                                                                                                                                                                                                                                                                                                                                                                                                                                                                                                                                                                                                                                                                                                                                                                                  |
|--------------|-------------|------------|----------------------------------------------------------------------------------------------------------------------------------------------------------------------------------------------------------------------------------------------------------------------------------------------------------------------------------------------------------------------------------------------------------------------------------------------------------------------------------------------------------------------------------------------------------------------------------------------------------------------------------------------------------------------------------------------------------------------------------------------------------------------------------------------------------------------------------------------------------------------------------------------------------------------------------------------------------------------------------------------------------------------------------------------------------------------------------------------------------------------------------------------------------------------------------------------------------------------------------------------------------------------------------------------------------------------------------------------------------------------------------------------------------------------------------------------------------------------------------------------------------------------------------------------------------------------------------------------------------------------------------|
| 3-4          | 210         | 16.63      | Vat1, Vars, Ube2b, Uba2, Tuba8, Tuba1c, Tsta3, Tspan8, Trip10, Trap1, Tomm70a, Tom112, Tipr1, Timm8a1, Tgm2, Tbca, Stat1, Sptbn1, Snx5, Sntb1, Smyd2, Sf3b1, Serpina3m, Rps3, Rps27, Rpl14, Rpl10, RGD1562373, Rabgga, Qars, Pura, Psmc3, Psmc6, Prkaca, Pgm5, Pfdn2, Pccb, Pcca, Paics, Pafah1b1, Oxsm, Nomo1, Ndufv3-ps1; Ndufv3, Napg, Mypn, Mybph, Mrps31, Map7d1, LOC688717, LOC683667, LOC641316, Lmna, Lmna, Lamp1, Itsn1, Itga7, Ide, Hnrnpc, Hmox2, Hk2, Hibch, Hgd, Hars, Gna12, Gmps, Gga1, Gfm1, Gcsh, Fundc2, Fdps, Fam21c, Epb4.1, Eml1, Eif4a1, Eif3e, Eif2b3, Ech1, Dbt, Dak, Ctsl1, Ctsh, Csde1, Copb2, Copb1, Col12a1, Clpx, Cd9, Capza2, Camk2d, Atp2b1, Ate1, Asph, Asah1, Arpe5, Apod, Apoa2, Apex1, Akr1a1, Actn2, Aass, Xpnpep1, Vps35, Vamp2, Uchl3; Uchl3-ps1, Trdn, Tardbp, Syncrip, Sugt1, Sqstm1, Sptb, Spag7, Snx1, Slc25a12, Slc12a2, Set, Serping1, Serpinf2, Serpinb6a, Serpina6, Sephs2, Sbk2, Sars, Sae1, Rps27a, Rnmt, RGD1565045, RGD1563757, RGD1559786, RGD1559475, RGD1359600, RGD1310507, RGD1308874, RGD1306839, RGD1306148, Ran, Rab5b, PVR, Ptges2, Prx, Prune, Prkcsb, Prkacb, Ppp3r1, Ppp1r12b, Postn, Phyh, Phpt1, Pgcg, Pex19, Pcyt1a, Pcnp, Pank4, Nefh, Nedd8, Ndufv3-ps1; Ndufv3, Ndufb4, Ncam1, Myh9, Mt-nd5, Mtdh, Mpst, Mecr, Mapk9, LOC688073, LOC686617, LOC682316, LOC364224, Lcp1, Lamc1, Isoc1, Hspb7, Hsd17b4, Hist1h1b, Hibch, Grpel1, Gpd2, Glc, Glrx3, Ghitm, Fhod1, Fgg, Farsb, Fam120a, Erp29, Eif4ebp1, Eif3s10, Eif3d, Ehd4, Eef1d, Depdc6, Ddx5, Dars, Cox6a1, Coq6, Copa, Col6a2, Col1a2, Ckb, Cct3, Cab39, Bcap29, Asna1, Akr1c1, Ahnak, Add1, Acot5, Acot2 |
| 2            | 105         | 8.31       | Zadh2, Xdh, Wars2, Vps29, Vac14, Uox, Umps, Ube2m, Trim54, Trim25, Tacc2, Sync, Ssb, Srp72, Setd3, Sec23ip, Scrn3, Rps24, Rock2, RGD1563551, RGD1563180, RGD1561928, RGD1561459, RGD1560289, RGD1560149, Raly, Rab5a, Qk, Psmc1, Prep, Ppp1cc, Pmpcb, Pkia, Pip4k2a, Phka1, Parvb, Padi2, Orm1, Obscn, Nt5e, Np, Nid2, Nes, Nars, Mylk, Msra, Mrps27, Mrps10, Mrpl1, Mrlc2, Mcam, Mapre1, M6prbp1, LOC687565, LOC682245, LOC502730, LOC498793, LOC291863, Lap3, Itih3, Inpp1, Hnrnpl, Hmgn1, Golga4, Glul, Glc2, Gbe1, Fyn, Fn3k, Fkbp4, Fermt2, Fbxo40, Eif3k, Dync1i2, Dync1i2, Dst, Dnajb12, Dffa, Ctnnb1, Ctage5, Copz1, Cops4, Clasp2, Ccdc22, Capza1, Calm-ps2, Cacybp, Btf3, Bag5, Atp8b2, Aldob, Agfg1; Agfg1-s1, Adprh, Acyl, Actr3                                                                                                                                                                                                                                                                                                                                                                                                                                                                                                                                                                                                                                                                                                                                                                                                                                                                                     |
| 1            | 60          | 4.75       | Tubb3, Timp2, Tfrc, Syncrip, Srp72, Sparc1, Snap23, Scn4a, Scamp1, Rpl3, Rpl18, Rnaset2, Rilp, RGD1563863, RGD1309537, Prosc, Ppm1e, Parva, Oxsr1, Myeov2, Mrpl48, Mrpl27, mrpl11, Map7d2, Maea, LOC690662, LOC296197, Lar7, Lamb1, IgG-2a, Hd1bp, Hd1bp, Hdac6, H2afx, Gypc, Gucyl1a3, Gpt2, Flnb, Fis1, Fam129a, Ehbp111, Drg2, Cul3, Csrp2, Copz2, Cnpy3, Cdk5rap3, Bub3, Bat1, Atpbd4, Atp6v1, Atp2b4, Atp1b3, Atg3, Ard1a, Ap3d1, Ak2                                                                                                                                                                                                                                                                                                                                                                                                                                                                                                                                                                                                                                                                                                                                                                                                                                                                                                                                                                                                                                                                                                                                                                                       |
| <b>Total</b> | <b>1263</b> | <b>100</b> |                                                                                                                                                                                                                                                                                                                                                                                                                                                                                                                                                                                                                                                                                                                                                                                                                                                                                                                                                                                                                                                                                                                                                                                                                                                                                                                                                                                                                                                                                                                                                                                                                                  |

**Table S3:** Clinical chemistry of rats aged 6-27 months

| Age (months) | 6         | 12         | 18         | 21         | 24         | 27         |
|--------------|-----------|------------|------------|------------|------------|------------|
| ALT (U/L)    | 58.1±2.8  | 74.3±5.0   | 100.6±10.5 | 82.5±10.9  | 73.3±7.8   | 67.2±11.4  |
| ALP (U/L)    | 109.5±3.8 | 105.9±5.4  | 116.8±9.9  | 103.6±13.1 | 86.1±5.2   | 101.3±28.5 |
| TBIL (mg/dL) | 0.1±0.0   | 0.1±0.0    | 0.1±0.0    | 0.2±0.0    | 0.1±0.0    | 0.2±0.0    |
| TP (g/dL)    | 6.1±0.1   | 6.3±0.0    | 6.3±0.1    | 6.2±0.1    | 6.2±0.1    | 5.4±0.6    |
| ALB (g/dL)   | 4.0±0.0   | 4.0±0.1    | 3.8±0.1    | 3.5±0.1    | 3.6±0.1    | 2.7±0.4    |
| GLOB (g/dL)  | 2.2±0.1   | 2.4±0.1    | 2.5±0.1    | 2.6±0.1    | 2.7±0.1    | 2.6±0.3    |
| AGR          | 1.8±0.1   | 1.7±0.1    | 1.5±0.0    | 1.4±0.1    | 1.4±0.1    | 0.9±0.1    |
| GLU (mg/dL)  | 140.7±5.1 | 137.5±4.8  | 135.6±2.6  | 149.2±5.0  | 122.5±4.3  | 91.6±17.0  |
| UREA (mg/dL) | 18.7±0.8  | 17.8±0.6   | 17.6±0.7   | 15.0±0.7   | 23.9±6.9   | 18.3±4.0   |
| CREA (mg/dL) | 0.3±0.0   | 0.3±0.0    | 0.2±0.0    | 0.2±0.0    | 0.5±0.2    | 0.3±0.1    |
| Na (mEq/L)   | 143.4±0.3 | 144.8±0.2  | 144.6±0.6  | 143.0±0.3  | 145.0±0.7  | 128.9±16.1 |
| K (mEq/L)    | 5.0±0.1   | 4.9±0.1    | 4.7±0.1    | 5.0±0.1    | 4.7±0.1    | 4.2±0.5    |
| Cl (mEq/L)   | 102.4±0.3 | 104.0±0.5  | 104.0±0.6  | 103.5±0.4  | 103.5±0.4  | 92.0±11.5  |
| CA (mg/dL)   | 10.4±0.1  | 10.3±0.3   | 10.7±0.1   | 10.5±0.2   | 10.8±0.3   | 9.3±1.2    |
| PHOS (mg/dL) | 6.3±0.2   | 5.2±0.1    | 5.0±0.1    | 4.6±0.1    | 5.4±0.7    | 4.3±0.5    |
| CHOL (mg/dL) | 111.1±6.5 | 155.5±11.4 | 179.6±8.8  | 223.6±18.3 | 247.2±16.3 | 224.9±36.1 |
| TRIG (mg/dL) | 103.7±9.4 | 131.8±17.1 | 139.6±16.9 | 114.2±6.4  | 149.2±24.2 | 108.1±15.0 |
| CK (U/L)     | 593±116   | 486±82     | 409±103    | 513±55     | 358±53     | 435±87     |
| GGT (U/L)    | ND        | 3.0        | 3.5±0.5    | 4.0±1.0    | 4.0        | ND         |
| MG (mg/dL)   | 2.0±0.1   | 2.0±0.1    | 2.0±0.0    | 1.9±0.1    | 2.2±0.1    | 2.0±0.2    |
| UA (mg/dL)   | 1.0±0.1   | 0.9±0.1    | 0.8±0.1    | 0.8±0.1    | 0.8±0.1    | 0.8±0.1    |
| IRON (ug/dL) | 153.3±6.6 | 161.5±4.4  | 188.0±8.6  | 196.3±11.2 | 162.2±12.8 | 117.9±16.0 |

**Table S4:** Hematology of rats aged 6-27 months

| Age (months)       | 6          | 12         | 18         | 21         | 24         | 27         |
|--------------------|------------|------------|------------|------------|------------|------------|
| <b>WBC (K/uL)</b>  | 8.37±0.47  | 6.81±0.53  | 6.20±0.69  | 6.96±0.32  | 7.02±0.93  | 9.68±2.64  |
| <b>NEUP (%)</b>    | 15.31±1.38 | 20.78±2.86 | 24.09±2.15 | 22.37±2.11 | 26.64±3.29 | 34.04±5.75 |
| <b>LYMP (%)</b>    | 77.27±1.36 | 71.11±2.89 | 68.36±2.22 | 70.54±2.24 | 63.91±3.48 | 47.68±7.12 |
| <b>MONP (%)</b>    | 4.20±0.26  | 5.01±0.22  | 4.88±0.32  | 4.87±0.30  | 6.38±0.47  | 5.51±0.75  |
| <b>EOSP (%)</b>    | 1.97±0.23  | 1.75±0.11  | 1.39±0.14  | 1.39±0.21  | 1.56±0.18  | 0.92±0.21  |
| <b>BASP (%)</b>    | 0.15±0.02  | 0.15±0.02  | 0.14±0.02  | 0.23±0.04  | 0.17±0.03  | 0.23±0.05  |
| <b>LUCP (%)</b>    | 1.12±0.12  | 1.20±0.11  | 1.14±0.22  | 0.60±0.10  | 1.32±0.13  | 0.60±0.07  |
| <b>NEUA (K/uL)</b> | 1.24±0.08  | 1.47±0.31  | 1.52±0.24  | 1.56±0.18  | 2.06±0.57  | 4.30±1.87  |
| <b>LYMA (K/uL)</b> | 6.50±0.43  | 4.79±0.36  | 4.19±0.46  | 4.90±0.25  | 4.29±0.35  | 4.62±0.79  |
| <b>MONA (K/uL)</b> | 0.35±0.03  | 0.34±0.03  | 0.31±0.04  | 0.34±0.03  | 0.46±0.08  | 0.60±0.12  |
| <b>EOSA (K/uL)</b> | 0.17±0.03  | 0.12±0.01  | 0.09±0.01  | 0.10±0.02  | 0.10±0.02  | 0.09±0.01  |
| <b>BASA (K/uL)</b> | 0.01±0.00  | 0.01±0.00  | 0.01±0.00  | 0.02±0.00  | 0.01±0.00  | 0.12±0.10  |
| <b>LUCA (K/uL)</b> | 0.09±0.01  | 0.09±0.01  | 0.07±0.02  | 0.04±0.01  | 0.09±0.02  | 0.17±0.10  |
| <b>RBC (M/uL)</b>  | 8.28±0.11  | 7.96±0.07  | 7.34±0.63  | 7.65±0.07  | 7.56±0.25  | 6.81±0.86  |
| <b>HGB (g/dL)</b>  | 14.88±0.24 | 14.52±0.12 | 13.61±0.99 | 13.96±0.11 | 14.08±0.44 | 12.42±1.55 |
| <b>HCT (%)</b>     | 41.72±0.68 | 40.91±0.46 | 38.77±2.82 | 39.84±0.39 | 39.41±1.14 | 35.35±4.43 |
| <b>MCV (fL)</b>    | 50.41±0.56 | 51.39±0.61 | 54.29±2.21 | 52.13±0.58 | 52.23±0.72 | 46.20±5.78 |
| <b>MCH (pg)</b>    | 17.98±0.20 | 18.23±0.17 | 19.01±0.76 | 18.28±0.20 | 18.62±0.21 | 16.23±2.03 |
| <b>MCHC (g/dL)</b> | 35.70±0.17 | 35.49±0.16 | 35.09±0.14 | 35.05±0.15 | 35.66±0.28 | 31.31±3.81 |
| <b>PLT (K/uL)</b>  | 1047±36    | 944±56     | 841±109    | 952±67     | 1069±81    | 1002±132   |
| <b>RETP (%)</b>    | 2.40±0.10  | 2.32±0.10  | 3.03±0.75  | 2.41±0.20  | 2.77±0.65  | 2.47±0.37  |
| <b>RETA (K/uL)</b> | 198.2±8.3  | 184.3±7.2  | 185.5±6.9  | 183.1±13.9 | 197.8±32.9 | 184.0±29.9 |

**Table S5:** Expression of genes associated with the neuromuscular junction.

| GeneID | Symbol   | Cluster# | Name                                                        | AUC   | P-value  |
|--------|----------|----------|-------------------------------------------------------------|-------|----------|
| 29161  | Cav3     | 1        | caveolin 3                                                  | -1.68 | 5.29E-13 |
| 24588  | Nefm     | 3        | neurofilament, medium polypeptide                           | 1.55  | 3.12E-10 |
| 29220  | Thbs4    | 3        | thrombospondin 4                                            | 1.55  | 1.45E-08 |
| 24511  | Itgb1    | 4        | integrin, beta 1                                            | 1.85  | 6.37E-19 |
| 54226  | App      | 4        | amyloid beta (A4) precursor protein                         | 2.49  | 4.21E-21 |
| 25745  | Myh9     | 5        | myosin, heavy chain 9, non-muscle                           | 1.09  | 4.45E-09 |
| 81725  | Musk     | 5        | muscle, skeletal, receptor tyrosine kinase                  | 3.85  | 1.76E-17 |
| 79557  | Chrna1   | 5        | cholinergic receptor, nicotinic, alpha 1 (muscle)           | 11.55 | 9.43E-23 |
| 363287 | Hdac4    | 5        | histone deacetylase 4                                       | 4.39  | 1.08E-20 |
| 25600  | Utrn     | 5        | utrophin                                                    | 1.15  | 1.79E-06 |
| 25439  | F2r      | 5        | coagulation factor II (thrombin) receptor                   | 2.57  | 1.96E-17 |
| 306759 | Spock1   | N.D      |                                                             |       |          |
| 84358  | Efna2    | N.D      |                                                             |       |          |
| 140908 | Cdk5     |          | cyclin-dependent kinase 5                                   | 0.24  | 3.75E-01 |
| 29665  | P2rx7    | N.D      |                                                             |       |          |
| 29192  | Psen1    |          | presenilin 1                                                | 0.76  | 3.25E-11 |
| 171287 | Epha7    | N.D      |                                                             |       |          |
| 112400 | Nrg1     | N.D      |                                                             |       |          |
| 25636  | Prkaca   |          | protein kinase, cAMP-dependent, catalytic, alpha            | 0.19  | 5.69E-03 |
| 362161 | Rapsn    |          | receptor-associated protein of the synapse                  | 0.00  | 7.32E-02 |
| 302975 | Syng3    | N.D      |                                                             |       |          |
| 361432 | Cdh15    |          | cadherin 15                                                 | -0.33 | 1.64E-02 |
| 79433  | Myh10    |          | myosin, heavy chain 10, non-muscle                          | 0.59  | 1.41E-05 |
| 114124 | Akap1    |          | A kinase (PRKA) anchor protein 1                            | -0.42 | 4.09E-07 |
| 89843  | Cxadr    | N.D      |                                                             |       |          |
| 25252  | Dlg1     |          | discs, large homolog 1 (Drosophila)                         | -0.54 | 2.03E-14 |
| 64362  | Des      |          | desmin                                                      | 0.32  | 1.15E-02 |
| 316539 | Epha4    |          | Eph receptor A4                                             | 0.21  | 5.41E-03 |
| 29366  | Serpine2 |          | serine (or cysteine) peptidase inhibitor, clade E, member 2 | -1.03 | 6.42E-04 |
| 117559 | Sv2a     | N.D      |                                                             |       |          |
| 117101 | Kcnc3    | N.D      |                                                             |       |          |
| 24246  | Camk2d   |          | calcium/calmodulin-dependent protein kinase II delta        | 0.19  | 4.04E-05 |
| 116671 | Cdk5r1   | N.D      |                                                             |       |          |

N.D. (not detected).

**Figure S1:** Weights of the triceps brachii (A) and bulbocavernosus levator anii muscle (B), and the hydroxyproline content of gastrocnemius muscles of 6-, 12-, 18-, 21-, 24- and 27-month old rats. \*, \*\*, \*\*\*, \*\*\*\* indicate  $p < 0.05, 0.01, 0.001, 0.0001$  vs. 6M, respectively ( $n = 7-10$ ).

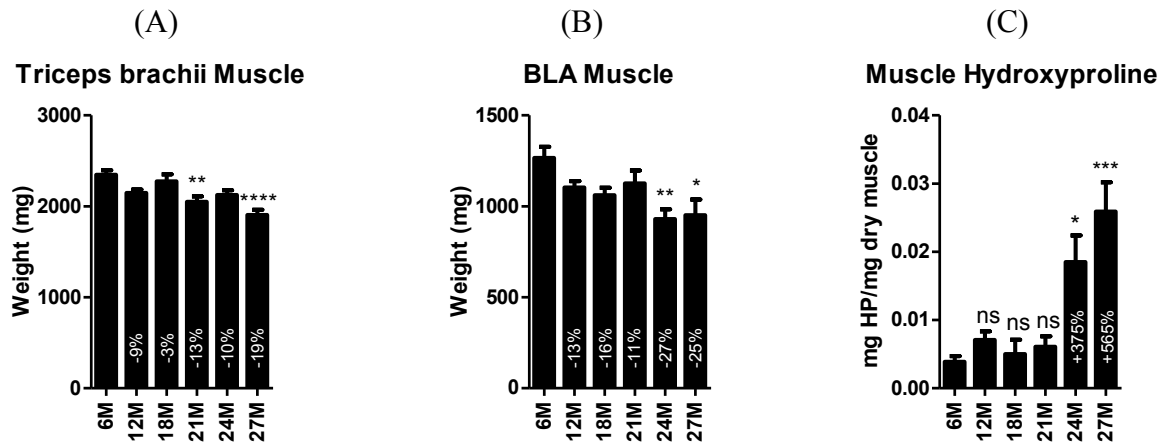

**Supplemental Figure S2:** Most of the genes in the 5 complexes of the OXPHOS pathway were depressed in sarcopenia. The numbers to the right of the gene symbols are AUC over the time course.

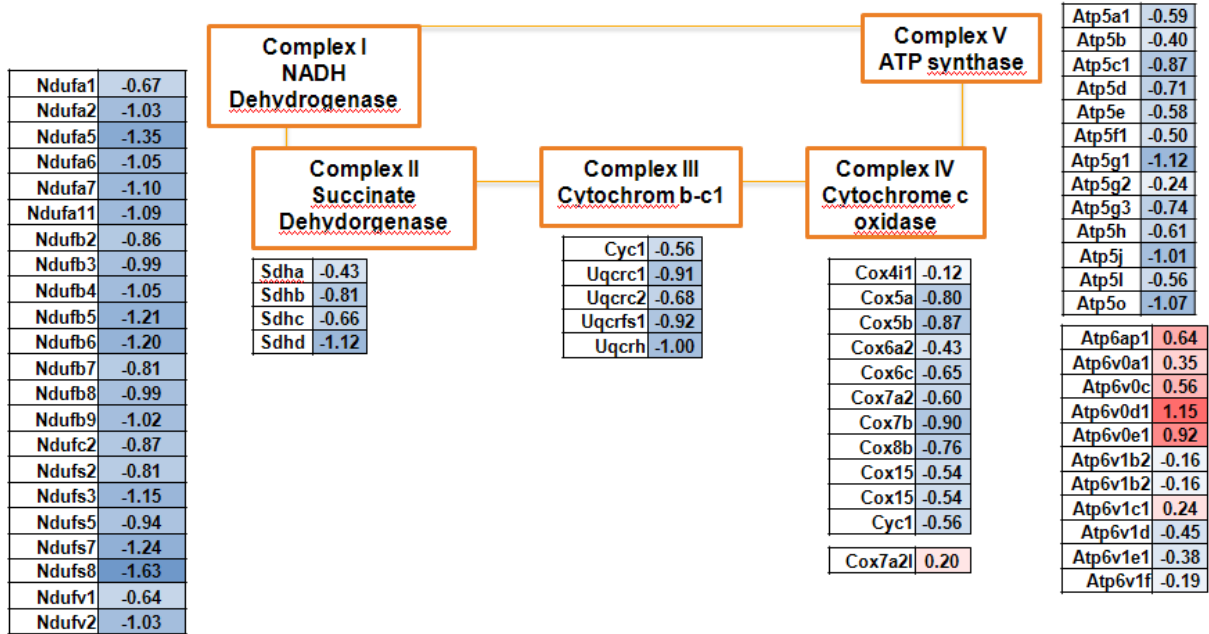

**Supplemental Figure S3:** Functional annotation analysis of the genes in cluster #4 (A) and cluster #5 (B) and the overlap between genes in clusters #3, #4 and #5 (C). Quantitative PCR verification of changes in expression of select genes in cluster #5 (D). \*, \*\*, \*\*\*, \*\*\*\* indicate  $p < 0.05, 0.01, 0.001, 0.0001$  vs. 6M, respectively (n = 7-10).

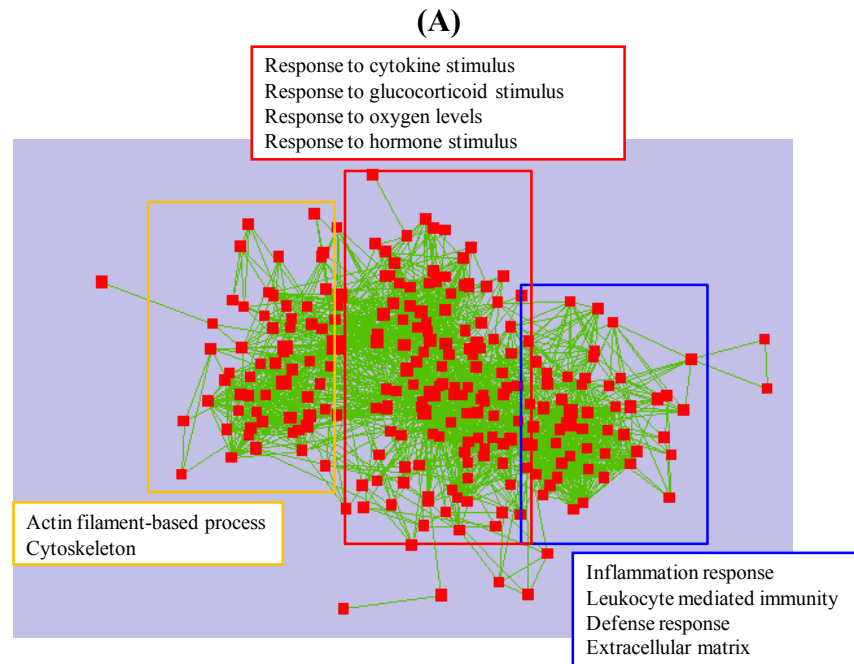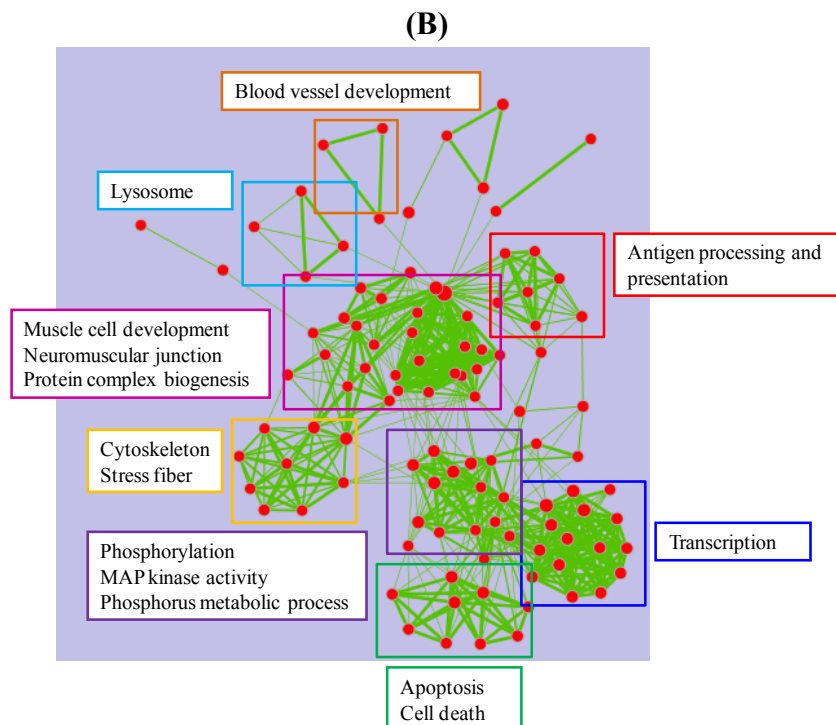



(C)

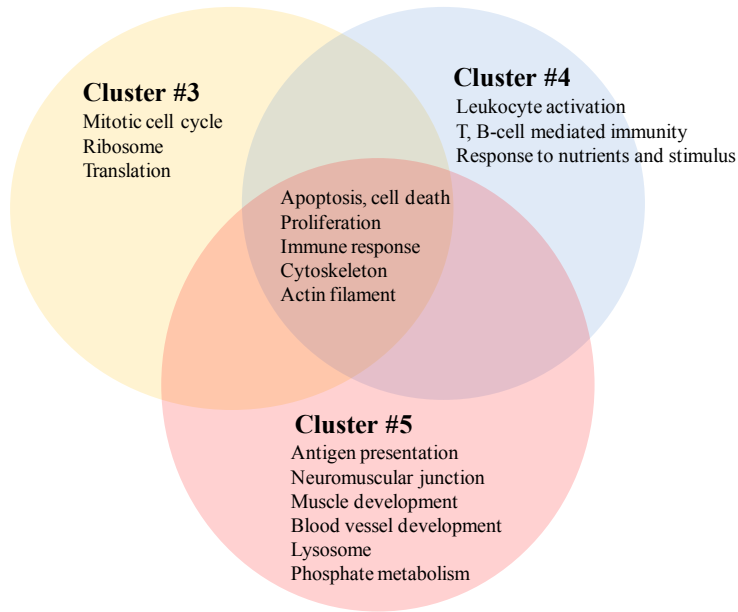

(D)

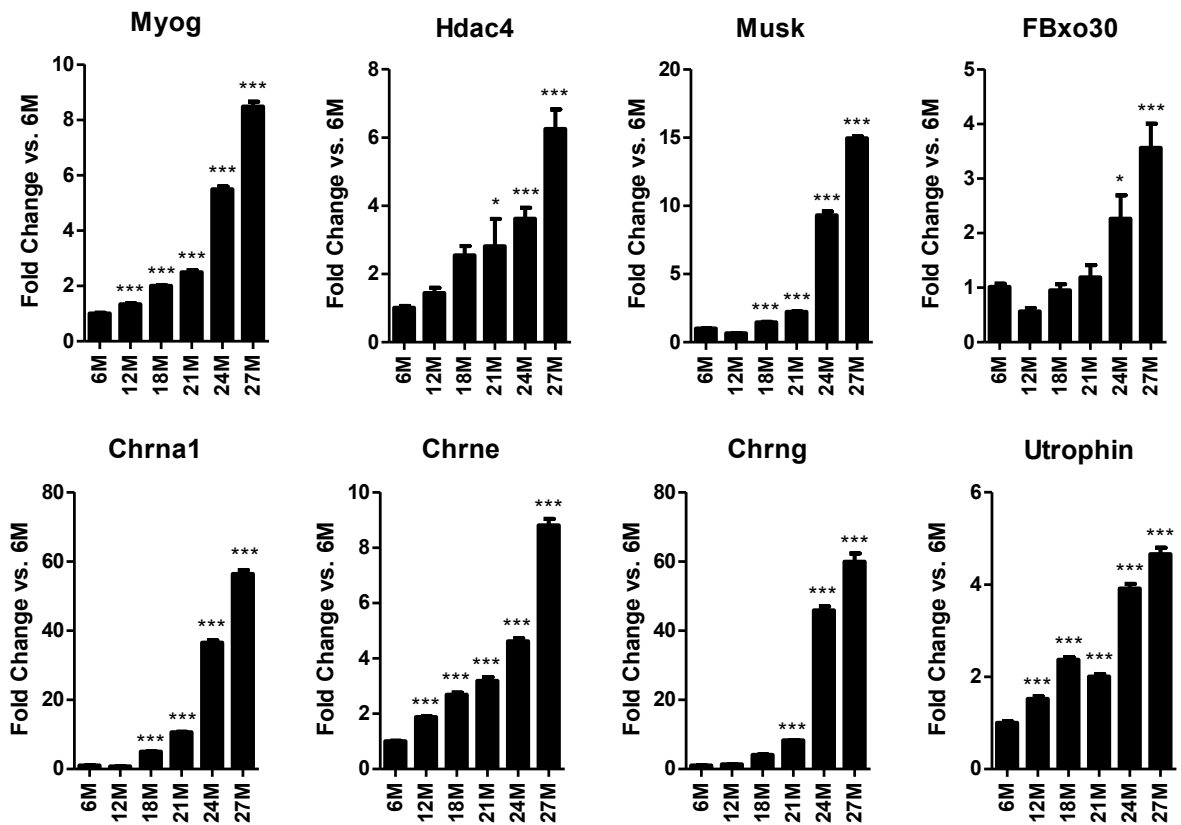

**Supplemental Figure S4:** Quantitative PCR verification of the changes in expression of transcripts for myosin heavy chain (MyHC) isoforms (A) and Ctgf and the E3 ligase, MuRF1 (B) in sarcopenia. \*, \*\*, \*\*\*, \*\*\*\* indicate  $p < 0.05, 0.01, 0.001, 0.0001$  vs. 6M, respectively (n = 7-10).

(A)

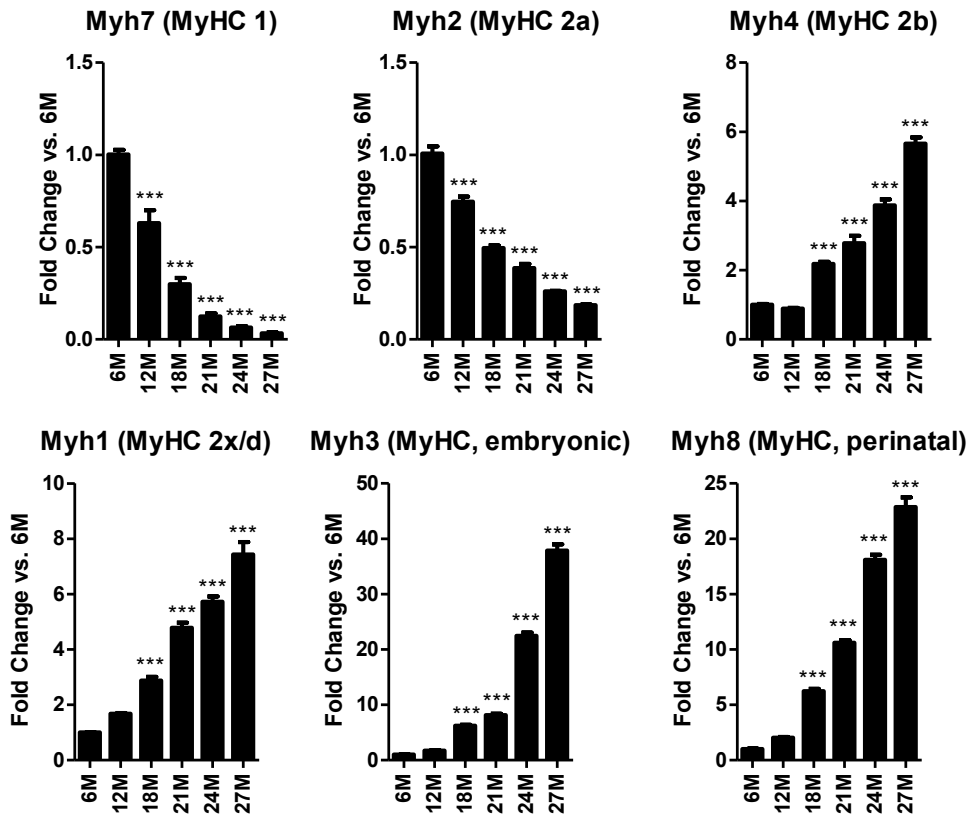

(B)

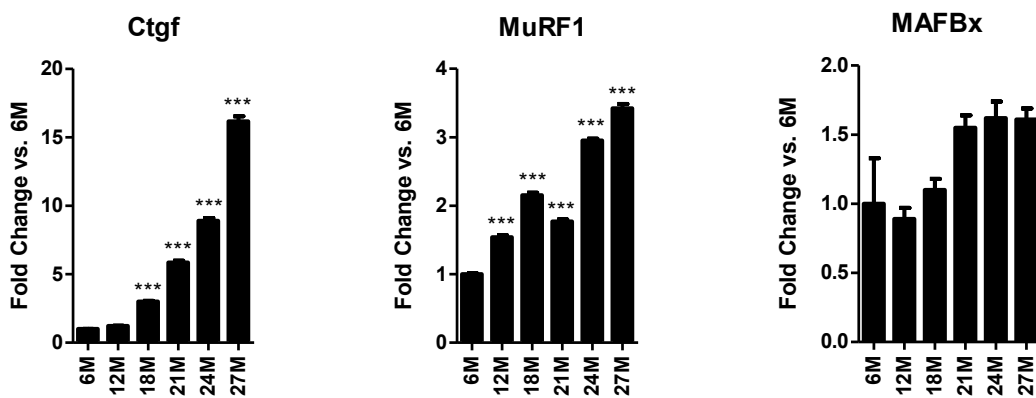

Supplement: MCB.01036-12_zmb999109802so1.pdf [file MCB.01036-12_zmb999109802so1.pdf]
